# Supplementary material
Source: MDPI journal article supplement (https://www.mdpi.com/2813-0227/3/3/18)
Supplement: s1 [file s1]

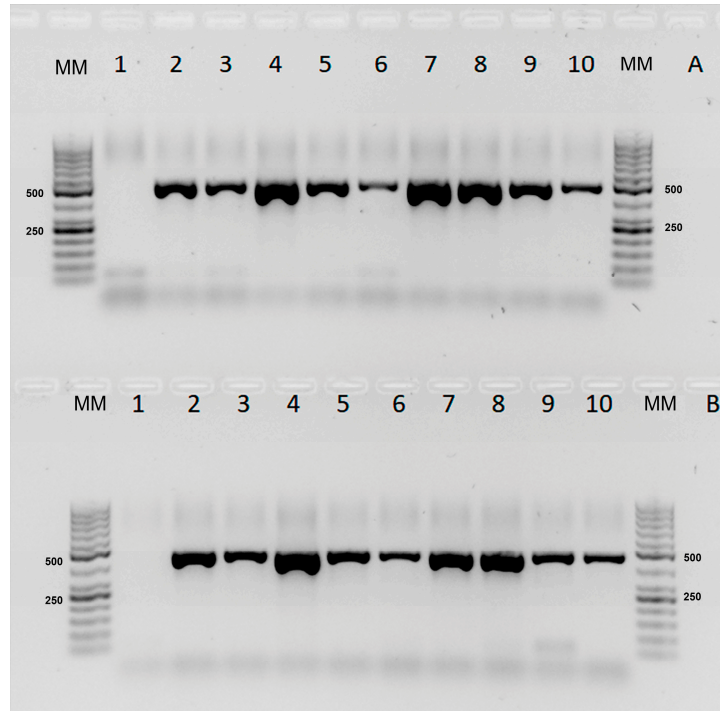

**Figure S1.** Comparison between 1 µL and 5 µL of the extracted RNA and different extraction protocols.

Lane 1 negative control (water-no virus), Lane 2—VEEV  $7 \times 10^5$  PFU/mL, Lane 3—EEEV/Sinv  $1.2 \times 10^5$  PFU/mL, Lane 4—VEEV  $5 \times 10^7$  PFU/mL, Lane 5—VEEV  $5 \times 10^4$  PFU/mL, Lane 6—VEEV  $5 \times 10^3$  PFU/mL, Lane 7—EEEV/Sinv  $4.5 \times 10^5$  PFU/mL, Lane 8—EEEV/Sinv  $4.5 \times 10^4$  PFU/mL, Lane 9—EEEV/Sinv  $4.5 \times 10^3$  PFU/mL, Lane 10—EEEV/Sinv  $4.5 \times 10^2$  PFU/mL.

**Table S1.** Retro transcription protocol.

| Master Mix Reagents                   | 20 µL of Reaction | Cycle | Temperature | Time   |
|---------------------------------------|-------------------|-------|-------------|--------|
| Oligo dt-primers 100 µM               | 6.6 µM (1 µL)     | 1     | 50 °C       | 30 min |
| dNTP mix 10 µM                        | 0.5 mM (1 µL)     | 1     | 95 °C       | 15 min |
| water                                 | 8 µL              |       |             |        |
| extracted sample                      | 5 µL              |       |             |        |
| RT-Buffer 5×                          | 1× (4 µL)         |       |             |        |
| Maxima H minus RT Enzyme mix 200 U/µL | 0.5 U/µL (1 µL)   |       |             |        |

**Table S2.** First phase PCR two steps format of the Grywna, Pfeiffer, and Sanchez protocols.

| Grywna PCR Protocol                 |                     |                                         |             |       |
|-------------------------------------|---------------------|-----------------------------------------|-------------|-------|
| Master Mix Reagents                 | 12.5 μL of Reaction | Cycle                                   | Temperature | Time  |
| DreamTaq Hot Start Green Master Mix | 1×                  | 1                                       | 95 °C       | 3 min |
| 2×                                  |                     |                                         |             |       |
| primer Gry 1 10 μM                  | 0.5 μM              | 10 cycles<br>touchdown<br><br>30 cycles | 95 °C       | 20 s  |
| primer Gry 2 10 μM                  | 0.5 μM              |                                         | 65–56 °C    | 20 s  |
| Retrotranscribed product            | 1 μL                |                                         | 72 °C       | 20 s  |
|                                     |                     |                                         | 95 °C       | 20 s  |
|                                     |                     |                                         | 55 °C       | 20 s  |
|                                     |                     |                                         | 72 °C       | 20 s  |

|                                              |        |            |       |          |
|----------------------------------------------|--------|------------|-------|----------|
|                                              |        | final step | 4 °C  | infinite |
| Grywna nested PCR protocol. The first phase. |        |            |       |          |
| DreamTaq Hot Start Green Master Mix          | 1×     | 1          | 95 °C | 3 min    |
| primer Gry 3                                 | 0.2 μM |            | 95 °C | 20 s     |
| primer Gry 4                                 | 0.1 μM | 40 cycles  | 58 °C | 20 s     |
| primers Gry5                                 | 0.1 μM |            | 72 °C | 20 s     |
| MgCl <sub>2</sub> 25 mM                      | 1.6 mM | final step | 4 °C  | infinite |
| DNA                                          | 1 μL   |            |       |          |
| Pfeffer PCR protocol.                        |        |            |       |          |
| DreamTaq Hot Start Green Master Mix          | 1×     | 1          | 95 °C | 3 min    |
| 2×                                           |        |            |       |          |
| M2W forward primer 10 μM                     | 1 μM   |            | 94 °C | 20 s     |
| cM3W reverse primer 10 μM                    | 1 μM   | 35 cycles  | 50 °C | 30 s     |
| Retrotranscribed product                     | 5 μL   |            | 72 °C | 60 s     |
|                                              |        | 1 cycle    | 72 °C | 10 min   |
|                                              |        | final step | 4 °C  | infinite |
| Pfeffer-nested PCR.                          |        |            |       |          |
| DreamTaq Hot Start Green Master Mix          | 1×     | 1          | 95 °C | 3 min    |
| M2W2 forward primer 10 μM                    | 1 μM   |            | 94 °C | 20 s     |
| cM3W reverse primer 10 μM                    | 1 μM   | 30 cycles  | 55 °C | 30 s     |
| DNA                                          | 2 μL   |            | 72 °C | 30 s     |
|                                              |        | 1 cycle    | 72 °C | 5 min    |
|                                              |        | final step | 4 °C  | infinite |
| Sanchez PCR protocol.                        |        |            |       |          |
| DreamTaq Hot Start Green Master Mix          | 1×     | 1          | 95 °C | 3 min    |
| 2×                                           |        |            |       |          |
| Alpha1+ forward primer 20 μM                 | 0.8 μM |            | 94 °C | 30 s     |
| Alpha1- reverse primer 20 μM                 | 0.8 μM | 40 cycles  | 52 °C | 60 s     |
| Retrotranscribed product                     | 5 μL   |            | 68 °C | 30 s     |
|                                              |        | 1 cycle    | 68 °C | 5 min    |
|                                              |        | final step | 4 °C  | infinite |
| Sanchez-nested PCR.                          |        |            |       |          |
| DreamTaq Hot Start Green Master Mix          | 1×     | 1          | 95 °C | 3 min    |
| 2×                                           |        |            |       |          |
| Alpha2+ forward primer 20 μM                 | 0.4 μM |            | 94 °C | 20 s     |
| Alpha2- reverse primer 20 μM                 | 0.4 μM | 30 cycles  | 52 °C | 30 s     |
| DNA                                          | 1 μL   |            | 72 °C | 15 s     |
|                                              |        | 1 cycle    | 72 °C | 5 min    |
|                                              |        | final step | 4 °C  | infinite |

**Table S3.** Phase II, RT-PCR one-step format of the Pfeffer, Sanchez, and Torii protocols.

| Pfeffer PCR One-Step RT-PCR Protocol. |                     |            |       |          |
|---------------------------------------|---------------------|------------|-------|----------|
| Master Mix Reagents                   | 12.5 μL of Reaction | Cycle      | Temp  | Time     |
| Buffer One step 5×                    | 1×                  | 1          | 50 °C | 30 min   |
| dNTPs 10 mM                           | 0.4 mM              | 1          | 95 °C | 15 min   |
| M2W forward primer 10 mM              | 1 μM                |            | 94 °C | 20 s     |
| cM3W reverse primer 10 mM             | 1 μM                | 35 cycles  | 50 °C | 30 s     |
| Rnase inhibitor 4U/μL                 | 0.04U/μL            |            | 72 °C | 60 s     |
| One-step RT-PCR Enzyme 25×            | 1×                  | 1 cycle    | 72 °C | 10 min   |
| Retrotranscribed product              | 5 μL                | final step | 4 °C  | infinite |
| Pfeffer-nested PCR protocol.          |                     |            |       |          |

|                                        |          |            |       |          |
|----------------------------------------|----------|------------|-------|----------|
| DreamTaq Hot Start Green Master Mix 2× | 1×       | 1          | 95 °C | 3 min    |
| M2W2 forward primer 10 mM              | 1 μM     | 30 cycles  | 94 °C | 20 s     |
| cM3W reverse primer 10 mM              | 1 μM     |            | 55 °C | 30 s     |
| Retrotranscribed product               | 2 μL     |            | 72 °C | 30 s     |
|                                        |          | 1 cycle    | 72 °C | 5 min    |
|                                        |          | final step | 4 °C  | infinite |
| Sanchez PCR. The second phase.         |          |            |       |          |
| Buffer One step 5×                     | 1×       | 1          | 50 °C | 30 min   |
| dNTPs 10 mM                            | 0.4 mM   | 1          | 95 °C | 15 min   |
| Alpha1+ forward primer 20 μM           | 0.8 μM   | 40 cycles  | 94 °C | 30 s     |
| Alpha1- reverse primer 20 μM           | 0.8 μM   |            | 52 °C | 60 s     |
| Rnase inhibitor 4U/μL                  | 0.04U/μL |            | 68 °C | 30 s     |
| One-step RT-PCR Enzyme 25×             | 1×       | 1 cycle    | 68 °C | 5 min    |
| Retrotranscribed product               | 5 μL     | final step | 4 °C  | infinite |
| Sanchez-nested PCR. The second phase.  |          |            |       |          |
| DreamTaq Hot Start Green Master Mix 2× | 1×       | 1          | 95 °C | 3 min    |
| Alpha2+ forward primer 20 μM           | 0.4 μM   | 30 cycles  | 94 °C | 30 s     |
| Alpha2- reverse primer 20 μM           | 0.4 μM   |            | 52 °C | 60 s     |
| DNA                                    | 2 μL     |            | 72 °C | 15 s     |
|                                        |          | 1 cycle    | 72 °C | 5 min    |
|                                        |          | final step | 4 °C  | infinite |
| Torii Protocol One-step RT-PCR.        |          |            |       |          |
| Buffer One step 5×                     | 1×       | 1          | 50 °C | 30 min   |
| dNTPs 10 mM                            | 0.4 mM   | 1          | 95 °C | 15 min   |
| Alpha1+ forward primer 20 μM           | 1 μM     | 43 cycles  | 94 °C | 30 s     |
| Alpha1- reverse primer 20 μM           | 1 μM     |            | 52 °C | 30 s     |
| Rnase inhibitor 4U/μL                  | 0.04U/μL |            | 72 °C | 30 s     |
| One-step RT-PCR Enzyme 25×             | 1×       | 1 cycle    | 72 °C | 5 min    |
| Retrotranscribed product               | 1 μL     | final step | 4 °C  | infinite |
